# Supplementary material for: Improved luminescence properties by the self-assembly of lanthanide compounds with a 1-D chain structure for the sensing of CH3COOH and toxic HS− anions
Source: Royal Society of Chemistry journal article supplement (doi:10.1039/c9ce01077g), 2019-01-01
Supplement: c9ce01077g1.pdf [file c9ce01077g1.pdf]

# Improved luminescence properties by self-assembly of lanthanide compounds with 1-D chain structure for sensing of CH<sub>3</sub>COOH and toxic HS<sup>-</sup> anions

Yuan-Yi Xu,<sup>a</sup> Peng Chen,<sup>a</sup> Ting Gao,<sup>\*a</sup> Hong-Feng Li<sup>a</sup> and Peng-Fei Yan<sup>a</sup>

<sup>a</sup> Key Laboratory of Functional Inorganic Material Chemistry (MOE), School of Chemistry and Materials Science, Heilongjiang University, No. 74, Xuefu Road, Nangang District, Harbin 150080, P.R. China. E-mail: gaotingmail@sina.cn.

## Synthesis of complexes 1, 3, 4 and doped compounds

**[Sm<sub>2</sub>L(TTA)<sub>4</sub>(OAc)<sub>2</sub>]<sub>n</sub> (1).** Yield: 0.169g (45.7%). Elemental analysis (%) calcd for C<sub>28</sub>H<sub>22</sub>F<sub>6</sub>GdNO<sub>7</sub>S<sub>2</sub> (812.95): C, 41.33; H, 2.71; N, 1.72. found: C, 41.30; H, 2.70; N, 1.73; IR (KBr, cm<sup>-1</sup>): 3058 (w), 2946 (s), 2733 (w), 2690(w), 1692 (vs), 1684 (vs), 1532 (s), 1431 (vs), 1302 (s), 1245 (vs), 1156 (m), 1104 (m), 961 (vs), 884 (w), 722 (m), 643 (w), 589 (m). UV-vis [MeOH, λ]: 211, 254, 348 nm.

**[Gd<sub>2</sub>L(TTA)<sub>4</sub>(OAc)<sub>2</sub>]<sub>n</sub> (3).** Yield: 0.176g (47.2%). Elemental analysis (%) calcd for C<sub>28</sub>H<sub>22</sub>F<sub>6</sub>GdNO<sub>7</sub>S<sub>2</sub> (819.84): C, 40.98; H, 2.68; N, 1.71. found: C, 41.00; H, 2.67; N, 1.70; IR (KBr, cm<sup>-1</sup>): 3062 (w), 2945 (s), 2734 (w), 2688(w), 1689 (vs), 1684 (vs), 1534 (s), 1429 (vs), 1299 (s), 1240 (vs), 1154 (m), 1103 (m), 962 (vs), 885 (w), 721 (m), 642 (w), 590 (m). UV-vis [MeOH, λ]: 211, 254, 348 nm.

**[Yb<sub>2</sub>L(TTA)<sub>4</sub>(OAc)<sub>2</sub>]<sub>n</sub> (4).** Yield: 0.181g (48.2%). Elemental analysis (%) calcd for C<sub>28</sub>H<sub>22</sub>F<sub>6</sub>GdNO<sub>7</sub>S<sub>2</sub> (835.63): C, 40.21; H, 2.63; N, 1.68. found: C, 41.19; H, 2.63; N, 1.67; IR (KBr, cm<sup>-1</sup>): 3058 (w), 2941 (s), 2728 (w), 2692(w), 1687 (vs), 1681 (vs), 1538 (s), 1432 (vs), 1296 (s), 1242 (vs), 1151 (m), 1101 (m), 963 (vs), 882 (w), 720 (m), 644 (w), 590 (m). UV-vis [MeOH, λ]: 211, 254, 348 nm.

**[(Sm<sub>x</sub>Gd<sub>1-x</sub>)<sub>2</sub>L(TTA)<sub>4</sub>(OAc)<sub>2</sub>]<sub>n</sub>** IR (KBr, cm<sup>-1</sup>): 3060 (w), 2950 (s), 2740 (w), 2691(w), 1692 (vs), 1681 (vs), 1533 (s), 1435 (vs), 1301 (s), 1242 (vs), 1153 (m), 1098 (m), 962 (vs), 880 (w), 719 (m), 645 (w), 583 (m). UV-vis [MeOH, λ]: 211, 254, 348 nm.

$[(\text{Eu}_x\text{Gd}_{1-x})_2\text{L}(\text{TTA})_4(\text{OAc})_2]_n$  IR (KBr,  $\text{cm}^{-1}$ ): 3055 (w), 2945 (s), 2736 (w), 2688(w), 1693 (vs), 1684 (vs), 1536 (s), 1430 (vs), 1303 (s), 1245 (vs), 1156 (m), 1105 (m), 963 (vs), 881 (w), 720 (m), 644 (w), 585 (m). UV-vis [MeOH,  $\lambda$ ]: 211, 254, 348 nm.

$[(\text{Yb}_x\text{Gd}_{1-x})_2\text{L}(\text{TTA})_4(\text{OAc})_2]_n$  IR (KBr,  $\text{cm}^{-1}$ ): 3057 (w), 2946 (s), 2733 (w), 2687(w), 1691 (vs), 1682 (vs), 1538 (s), 1431 (vs), 1297 (s), 1246 (vs), 1154 (m), 1104 (m), 961(vs), 882 (w), 722 (m), 641 (w), 582 (m). UV-vis [MeOH,  $\lambda$ ]: 211, 254, 348 nm.

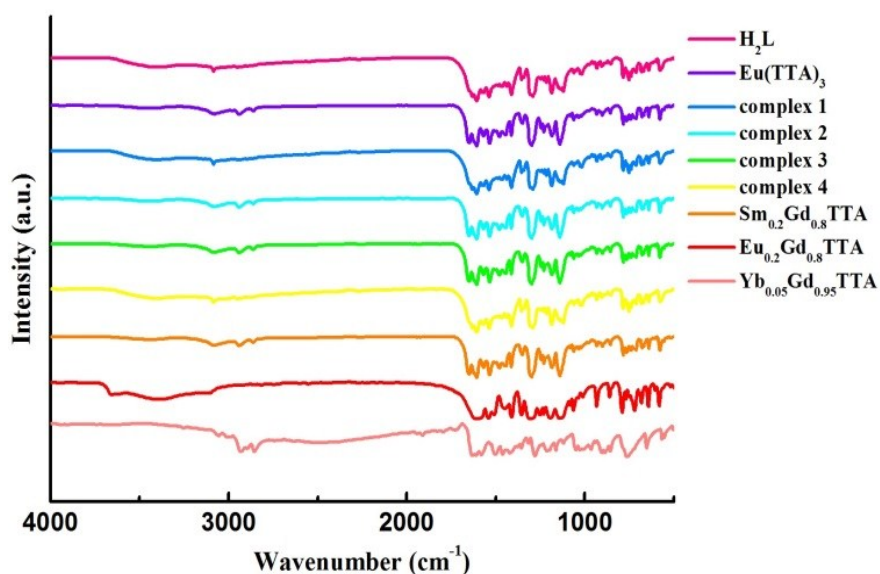

Fig.S1 IR spectra of  $\text{H}_2\text{L}$ ,  $\text{Eu}(\text{TTA})_3$ , complexes 1-4 and  $\text{Ln}_x\text{Gd}_{1-x}\text{TTA}$ .

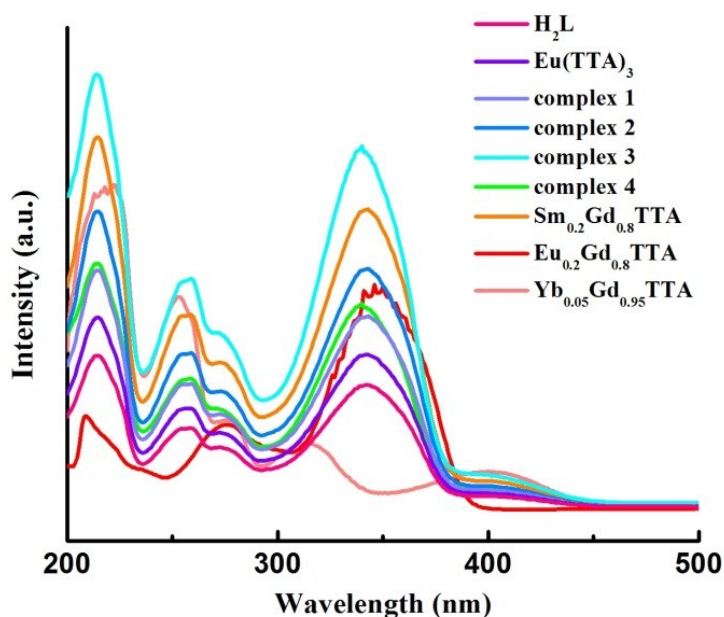

Fig.S2 UV-vis absorption spectra of  $\text{H}_2\text{L}$ ,  $\text{Eu}(\text{TTA})_3$ , complexes 1-4 and  $\text{Ln}_x\text{Gd}_{1-x}\text{TTA}$ .

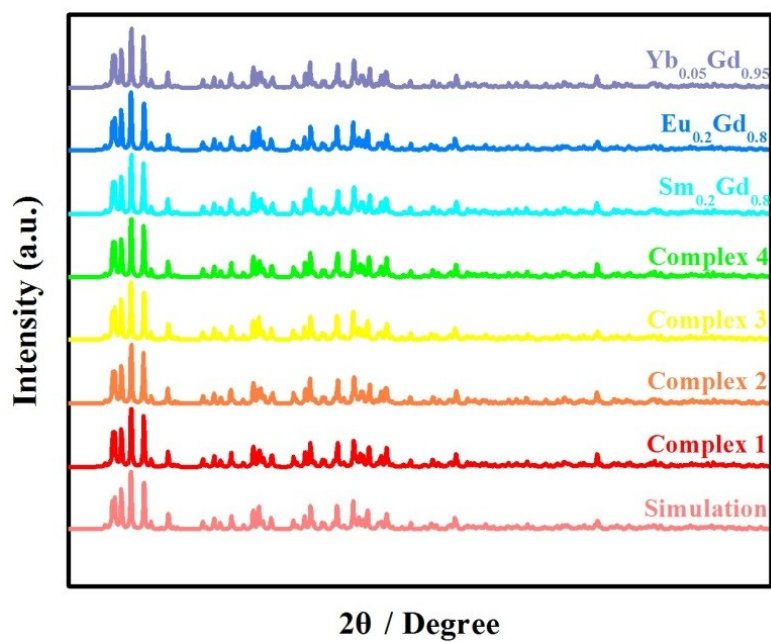

Fig.S3 PXR D patterns for simulation, complexes 1-4 and  $\text{Ln}_x\text{Gd}_{1-x}\text{TTA}$ .

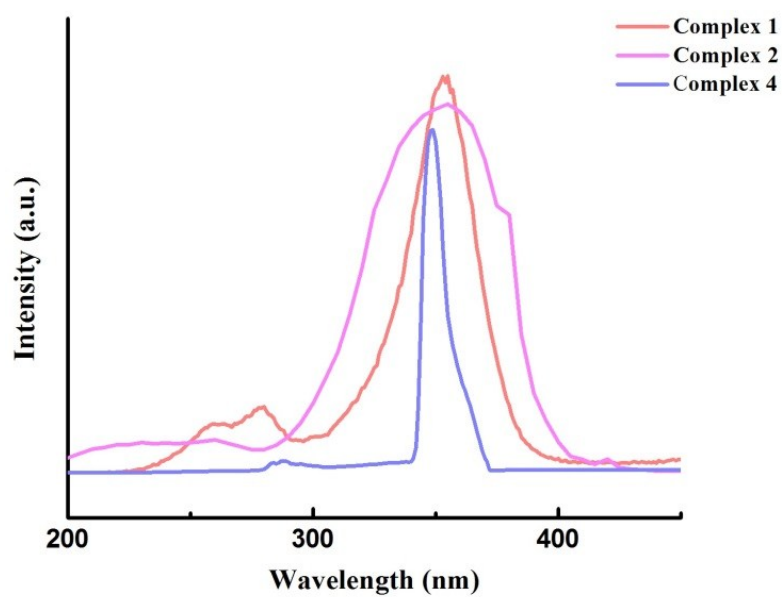

Fig.S4 The excitation spectra of complexes 1, 2 and 4 in the solid state.

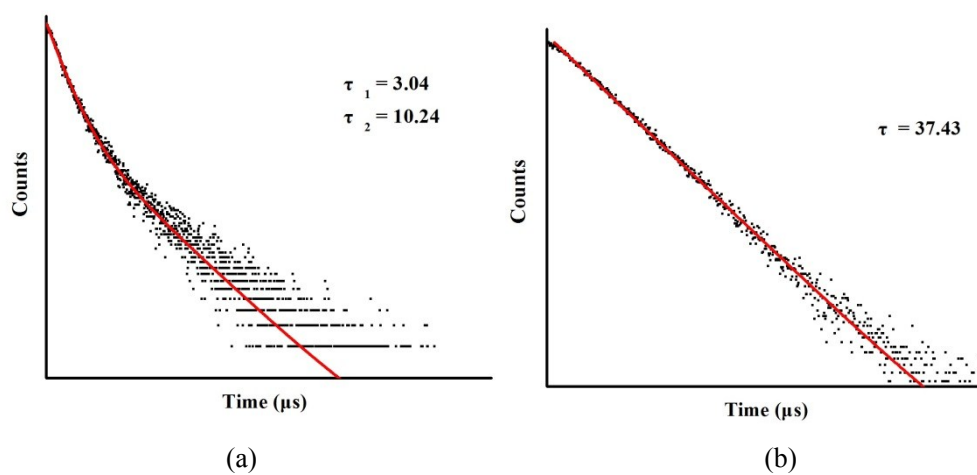

**Fig.S5** (a) Luminescence decay profile for complex **1** in the solid state; (b) Luminescence decay profile for doped complex **Sm<sub>0.2</sub>Gd<sub>0.8</sub>TTA** in the solid state.

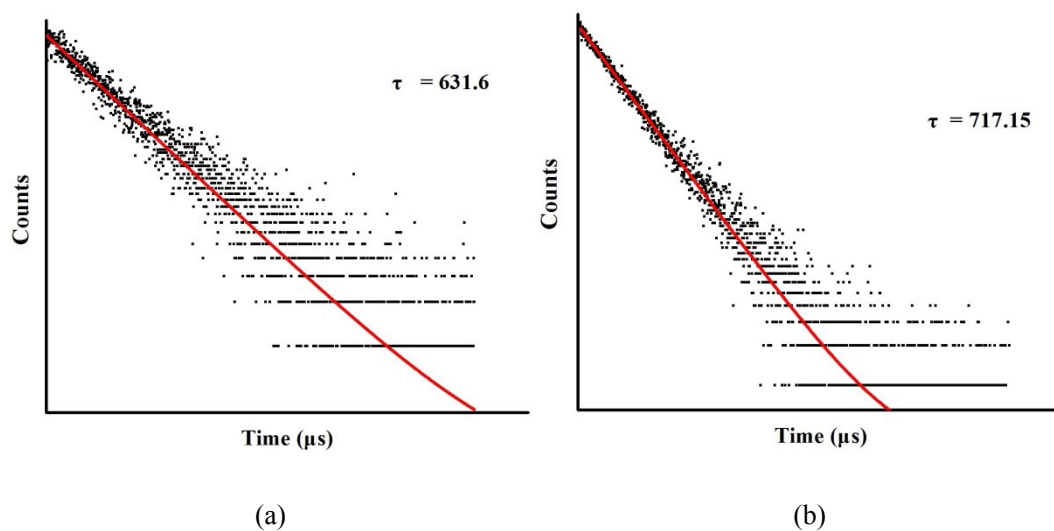

**Fig.S6** (a) Luminescence decay profile for complex **2** in the solid state; (b) Luminescence decay profile for doped complex **Eu<sub>0.2</sub>Gd<sub>0.8</sub>TTA** in the solid state.

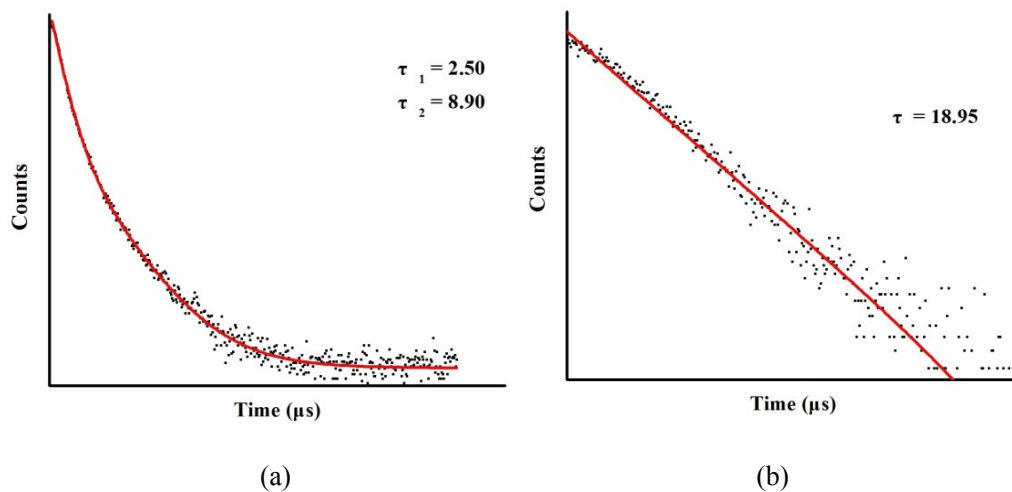

**Fig.S7** (a) Luminescence decay profile for complex **4** in the solid state; (b) Luminescence decay profile for doped complex  $\text{Yb}_{0.05}\text{Gd}_{0.95}\text{TTA}$  in the solid state.

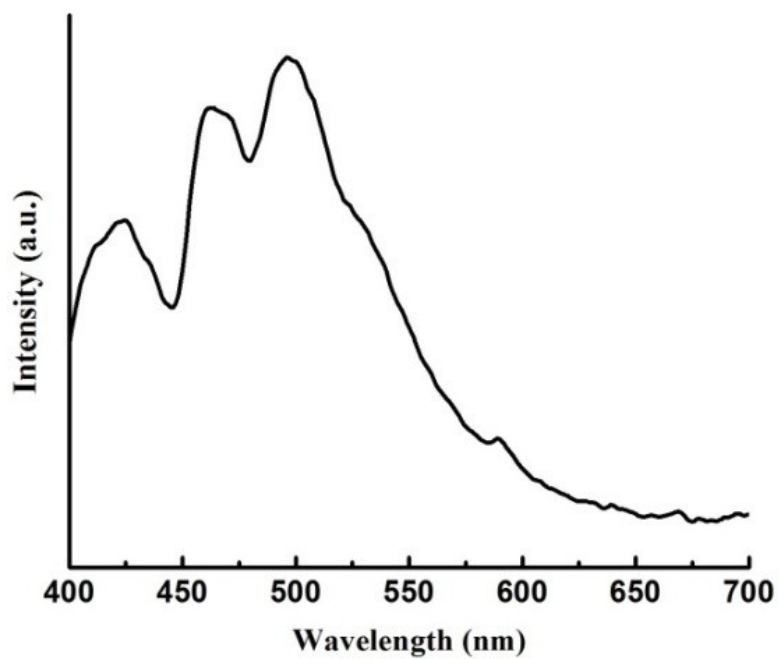

**Fig.S8** Phosphorescence spectrum of  $\text{Gd}_2\text{L}(\text{TTA})_4(\text{OAc})_2$  (**3**) at 77K.

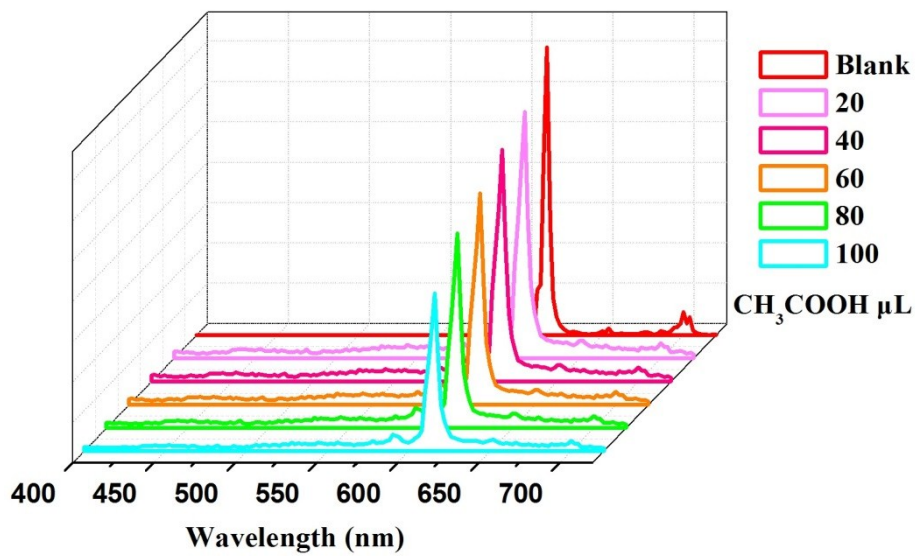

(a)

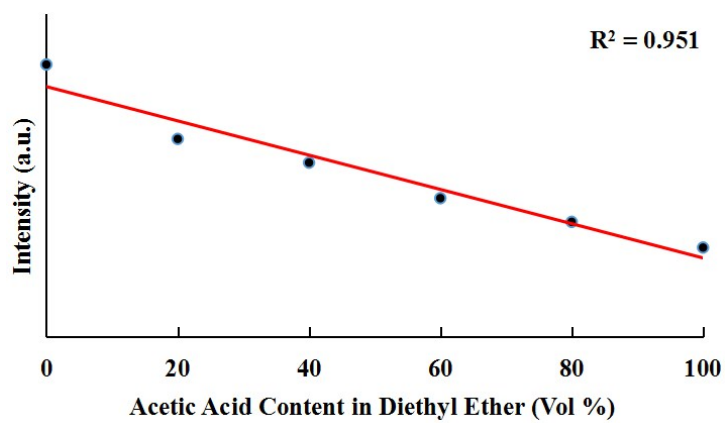

(b)

**Fig.S9** (a) Emission spectra of doped complex  $\text{Eu}_{0.2}\text{Gd}_{0.8}\text{TTA}$  upon incremental addition of acetic acid; (b) The calibration curve with the addition of acetic acid.

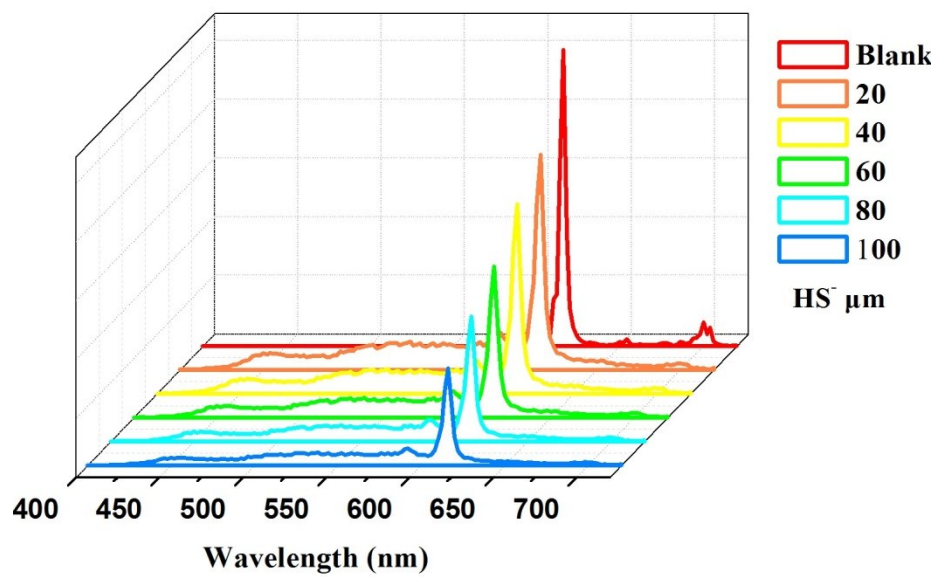

(a)

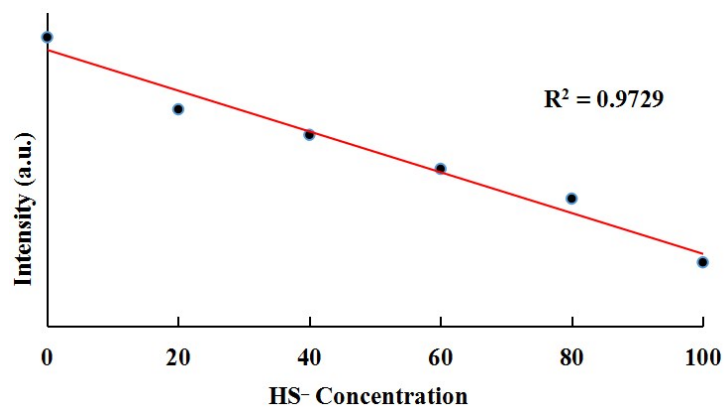

(b)

**Fig.S10** (a) Emission spectra of complex  $\text{Eu}_{0.2}\text{Gd}_{0.8}\text{TTA}$  with increasing concentration of  $\text{HS}^-$ ; (b) The calibration curve with increasing concentration of  $\text{HS}^-$ .

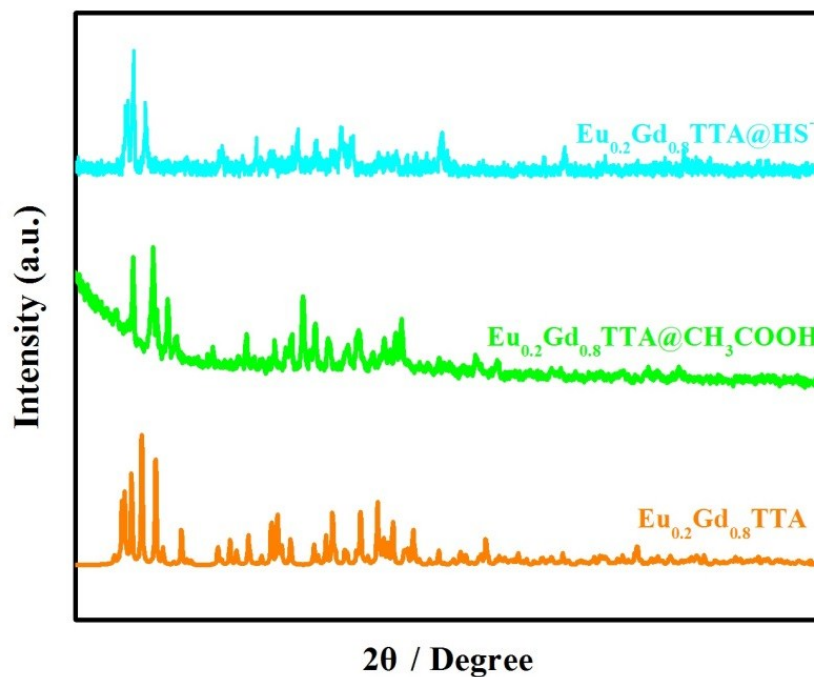

(a)

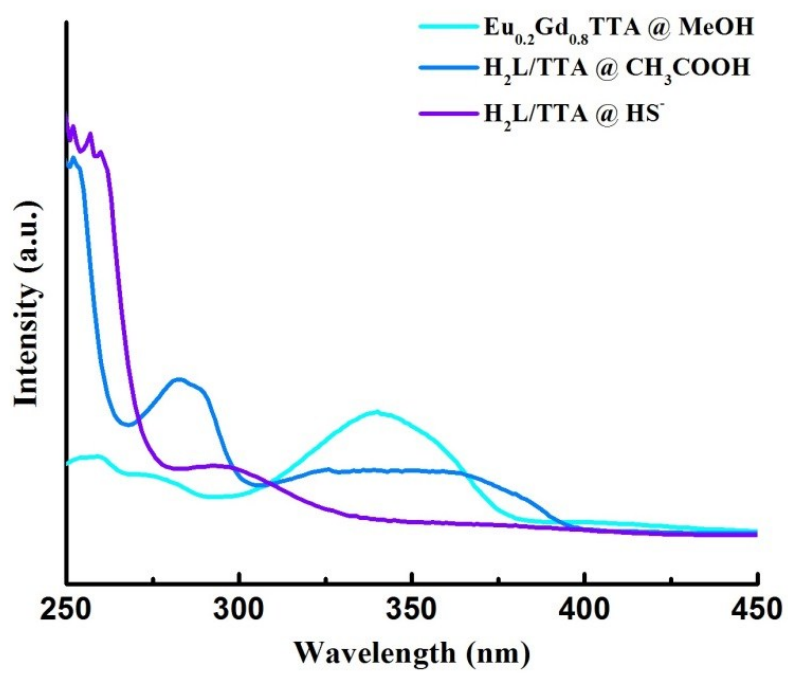

(b)

**Fig.S11** (a) PXRD patterns for  $\text{Eu}_{0.2}\text{Gd}_{0.8}\text{TTA}@CH_3COOH$  and  $HS^-$ ; (b) UV-vis absorption spectra of  $\text{Eu}_{0.2}\text{Gd}_{0.8}\text{TTA}@MeOH$ ,  $\text{H}_2\text{L}/\text{DBM}@CH_3COOH$  and  $HS^-$ .



**Table S1** Elemental analysis of lanthanide ions by ICP for doped complexes  $\text{Ln}_x\text{Gd}_{1-x}\text{TTA}$ 

| Complex      | $\text{Eu}_{0.2}\text{Gd}_{0.8}\text{TTA}$ |      | $\text{Sm}_{0.2}\text{Gd}_{0.8}\text{TTA}$ |      | $\text{Yb}_{0.05}\text{Gd}_{0.95}\text{TTA}$ |      |
|--------------|--------------------------------------------|------|--------------------------------------------|------|----------------------------------------------|------|
|              | Sm                                         | Gd   | Eu                                         | Gd   | Yb                                           | Gd   |
| Wt % (Found) | 20.0                                       | 80.0 | 20.0                                       | 80.0 | 5.0                                          | 95.0 |
| Mol%         | 19.2                                       | 80.8 | 18.9                                       | 81.1 | 4.4                                          | 95.6 |

**Table S2**  $[(\text{Ln}_x\text{Gd}_{1-x})_2\text{L}(\text{TTA})_4(\text{OAc})_2]_n$  – luminescence intensity ratio, lifetime and quantum yield of  $\text{Ln}^{3+}$  ions in corresponding doped materials.

| $\text{Ln}^{3+}$           | $\text{Sm}^{3+}$ (1) | $\text{Eu}^{3+}$ (2) | $\text{Yb}^{3+}$ (4) |
|----------------------------|----------------------|----------------------|----------------------|
| $I/I_0$                    | 3.68                 | 3.43                 | 3.8                  |
| $\tau_0$ ( $\mu\text{s}$ ) | 3.04 / 10.24         | 631.60               | 2.50 / 8.90          |
| $\tau$ ( $\mu\text{s}$ )   | 37.43                | 717.15               | 18.95                |
| $\varphi_0$ (%)            | 1.1                  | 53.9                 | —                    |
| $\varphi$ (%)              | 6.8                  | 76.2                 | —                    |

$I_0$ ,  $\tau_0$ ,  $\varphi_0$ :  $\text{Ln}_2\text{L}_2(\text{DBM})_4(\text{OAc})_2$ ;  $I$ ,  $\tau$ ,  $\varphi$ : doped materials –  $\text{Eu}_{0.2}\text{Gd}_{0.8}\text{TTA}$ ,  $\text{Sm}_{0.2}\text{Gd}_{0.8}\text{TTA}$  and  $\text{Yb}_{0.05}\text{Gd}_{0.95}\text{TTA}$

**Table S3** The triplet energy levels of  $\text{H}_2\text{L}/\text{TTA}$  and the energy gaps  $\Delta E(\text{T}_1-\text{Ln}^{3+})$ 

|                                       | $\text{T}_1$ | $\text{Eu}^{3+}$ | $\text{Sm}^{3+}$ | $\text{Yb}^{3+}$ |
|---------------------------------------|--------------|------------------|------------------|------------------|
| Energy level ( $\text{cm}^{-1}$ )     | 20161        | 17500            | 17924            | 10000            |
| $\Delta E(\text{T}_1-\text{Ln}^{3+})$ | —            | 2661             | 2237             | 10161            |
